# Supplementary material for: Efficacy and Safety of Intravenous Sufentanil Administration in Low-Severity Acute Trauma as A Competence of Paramedics: A Follow-Up Observational Study
Source: Research Square preprint supplement (doi:10.21203/rs.3.rs-6643859/v1), 2025-05-14
Supplement: Supplementary file 1 [file 9a5235634e423f9e75a95c14.docx]

**Supplemental Digital Content**

***Characteristics of paramedics******in the EMS of the Karlovy Vary Region in 2024***

- Ambulance crew paramedics delivering PEC

n = 112

- Paramedics who lost competency at the beginning of year

n = 3

- Number of courses completed by paramedics with competency from 2020 to 2024

1 n = 16 (29%)

2 n = 10 (18%)

3 n = 26 (46%)

4 (lectors) n = 4 (7%)

**Table S1. Characteristics of paramedics in 2024 by competency to administer intravenous sufentanil in adult acute trauma: a comparison of two groups**

|  | Without competence  (n = 56) | Competence to administer (n = 56) | p-value |
| --- | --- | --- | --- |
| Age (years) | 45.9 (10.9) | 44.0 (10.0) | .94 |
| Gender (man) | 14 (25%) | 26 (46%) | .018 |
| Higher professional education | 37 (66%) | 31 (55%) | .29 |
| Bachelor’s degree | 15 (27%) | 16 (29%) |
| Master’s or higher degree | 4 (7%) | 9 (16%) |
| Length of praxis (years) | 14.6 (9.3) | 13.9 (7.7) | .32 |

*Data are presented as mean and standard deviation or as number and percentage;*

**Table S2. Other characteristics**

|  | CONSULTATION  (n = 233) | COMPETENCE  (n = 229) | p-value |
| --- | --- | --- | --- |
| Urgency by MDC (I-IV range) | 3.0 (0.2) | 3.0 (0.1) | .10 |
| Transport time (min) | 22.6 (11.5) | 21.7 (14.6) | .52 |
| Additional i.v. paracetamol use  dose (mg) | 79 (34%)  983 (78) | 124 (54%)  992 (85) | <.001  .47 |
| Other additional analgesics  diclofenac  ketamin  ketamin/propofol  metamizole | 9 (4%)  4 (2%)  1 (<1%)  3 (1%) | -  -  -  - |  |
| NRS, initial (points 0-10) | 7.6 (1.7) | 7.4 (1.8) | .33 |
| Reported (NRS) in cases | *n = 180* | *n = 216* | - |
| NRS at handover (points 0-10) | 3.8 (2.0) | 3.4 (1.6) | .029 |
| Reported (NRS) in cases | *n = 169* | *n = 212* | - |

*Data are presented as mean (standard deviation) or as number and percentage. Abbreviations: MDC, medical dispatching center, NRS, numeric rating scale.*

**Table S3. Impact of intravenous sufentanil administration on physiological parameters in trauma patients**

|  | CONSULTATION  (n = 233) | | COMPETENCE  (n = 229) | | p-value |
| --- | --- | --- | --- | --- | --- |
| Initial | Handover | Initial | Handover |
| Systolic BP (mmHg) | 144.5 (23.3) | 139.0 (22.1) | 144.4 (21.0) | 139.0 (18.9) | .98  .98 |
| Systolic BP difference (mmHg) |  | -5.3 (15.6) |  | -5,4 (12.8) | .93 |
| Diastolic BP (mmHg) | 77.3 (11.6) | 79.2 (13.0) | 80.6 (11.2) | 78.0 (10.8) | .002  .27 |
| Diastolic BP difference (mmHg) |  | +1.8 (8.2) |  | -2.5 (9.6) | <0.001 |
| HR (bpm) | 84.8 (15.7) | 82.5 (13.6) | 84.0 (12.5) | 81.9 (11.8) | .53  .63 |
| HR difference  (bpm)1 |  | -2.4 (10.7) |  | -2.1 (9.5) | .75 |
| SpO2 (%) | 96.6 (3.7) | 96.9 (2,1) | 96.9 (2.4) | 96.7 (1.8) | .34  .32 |
| SpO2 difference (%) |  | +0.3 (3.5) |  | -0.1 (2.2) | .096 |
| RR  (breaths per minute) | 16.0 (2.6) | 15.3 (1.9) | 15.6 (2.4) | 14.9 (1.8) | .14  .03 |
| RR difference  (breaths per minute) |  | -0.7 (2.1) |  | -0.6 (1.7) | .74 |
| Glasgow Coma Scale (points) | 15.0 (0.3) | 15.0 (0.2) | 15.0 (0.1) | 15.0 (0.2) | .12  .97 |
| Glasgow Coma Scale  (difference) |  | 0 (0.3) |  | 0 (0.1) | .17 |

*Data are presented as mean (standard deviation). Abbreviations: BP – blood pressure; HR – heart rate; SpO₂ – peripheral oxygen saturation; RR – respiratory rate. Differences reflect changes between initial values and those recorded at handover in the emergency department.*

**Table S4. Other reported conditions and aspects**

|  | CONSULTATION  (n = 233) | COMPETENCE  (n = 229) | p |
| --- | --- | --- | --- |
| Ebrietas | 8 (3%) | 6 (3%) | .61 |
| Medication used before EMS arrival | methoxyfluranum (n = 1)  pervitin (n = 1)  paracetamol/guaifenesinum (n = 1)  tramadol (n =1) | ibuprofenum (n = 2)  tramadol/paracetamol (n = 1)  paracetamol (n = 1)  metamizole (n =1)  clonazepam (n = 1)  kratom (n = 1) | -  -  -  -  -  - |

*Data are presented as absolute numbers, with percentages provided for cases of ebriety.*
